# Supplementary material for: Design, Optimization, and Modeling Study of Ultrasound-Assisted Extraction of Bioactive Compounds from Purple-Fleshed Sweet Potatoes
Source: MDPI journal article supplement (doi:10.3390/foods13101497), 2024-05-12
Supplement: s1 [file s1]

# Design, Optimization, and Modeling Study of Ultrasound-Assisted Extraction of Bioactive Compounds from Purple-Fleshed Sweet Potatoes

## Supplementary Material

**Table S1.** ANOVA for response surface polynomial model off all independent variables.

| Variable or Factor            | TA     |    |        |         |         | TPC      |    |          |         |         |
|-------------------------------|--------|----|--------|---------|---------|----------|----|----------|---------|---------|
|                               | SS     | DF | MS     | F-value | p-value | SS       | DF | MS       | F-value | p-value |
| X <sub>1</sub>                | 63.002 | 1  | 63.002 | 166.332 | <0.001* | 2356.077 | 1  | 2356.077 | 107.324 | <0.001* |
| X <sub>2</sub>                | 0.004  | 1  | 0.004  | 0.010   | 0.923   | 190.554  | 1  | 190.554  | 8.680   | 0.026*  |
| X <sub>3</sub>                | 5.768  | 1  | 5.768  | 15.229  | 0.008*  | 138.476  | 1  | 138.476  | 6.308   | 0.046*  |
| X <sub>1</sub> <sup>2</sup>   | 1.898  | 1  | 1.898  | 5.011   | 0.066*  | 812.502  | 1  | 812.502  | 37.011  | 0.001*  |
| X <sub>2</sub> <sup>2</sup>   | 0.980  | 1  | 0.980  | 2.589   | 0.159   | 2295.267 | 1  | 2295.267 | 104.554 | <0.001* |
| X <sub>3</sub> <sup>2</sup>   | 8.907  | 1  | 8.907  | 23.517  | 0.003*  | 25.409   | 1  | 25.409   | 1.157   | 0.323   |
| X <sub>1</sub> X <sub>2</sub> | 0.459  | 1  | 0.459  | 1.211   | 0.313   | 64.658   | 1  | 64.658   | 2.945   | 0.137   |
| X <sub>1</sub> X <sub>3</sub> | 17.046 | 1  | 17.046 | 45.002  | 0.001*  | 232.241  | 1  | 232.241  | 10.579  | 0.017*  |
| Lack of fit                   | 0.079  | 2  | 0.039  | 0.104   | 0.903   | 22.904   | 2  | 11.452   | 0.522   | 0.618   |
| Pure error                    | 2.273  | 6  | 0.379  |         |         | 131.718  | 6  | 21.953   |         |         |
| R <sup>2</sup>                | 0.978  |    |        |         |         | 0.981    |    |          |         |         |
| R <sup>2</sup> -adj           | 0.956  |    |        |         |         | 0.960    |    |          |         |         |

X<sub>1</sub> – time (min); X<sub>2</sub> – temperature (°C); X<sub>3</sub> – volume of solid:liquid ratio (mL); TA- total anthocyanin, TPC- total phenolic content; SS, DF and MS represent sum of squares, degree of freedom, and mean square, respectively; \*p < 0.05;

Response surface and contour plots for interactions between independent variables (extraction factors) on extraction yield of total anthocyanin from purple-fleshed sweet potatoes:

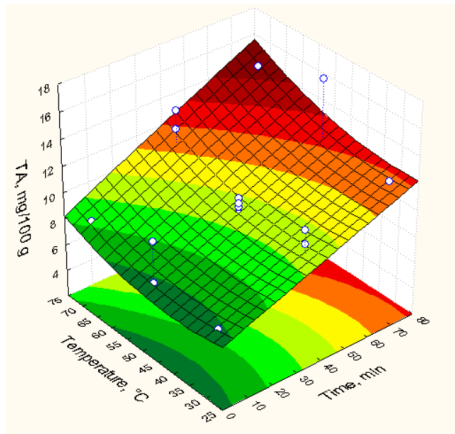

(a)

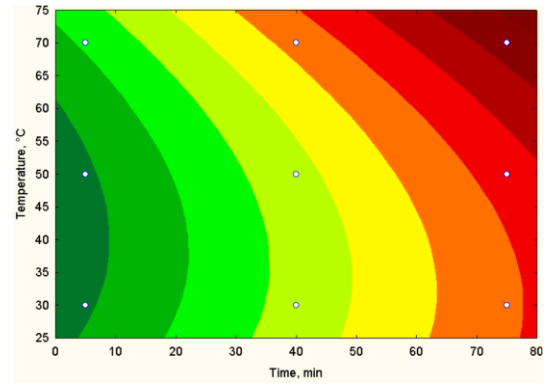

(b)

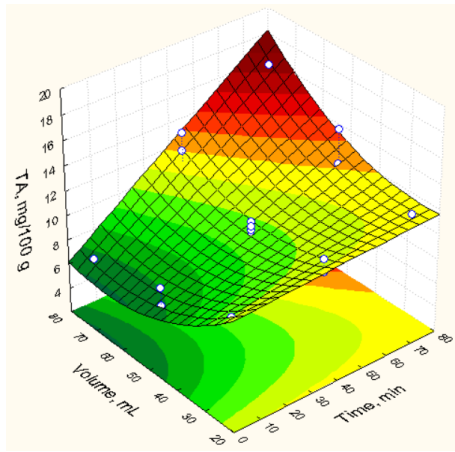

(c)

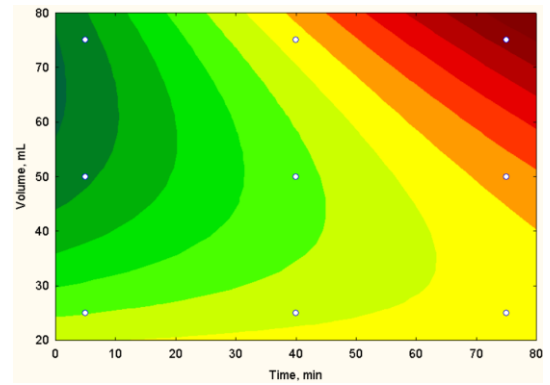

(d)

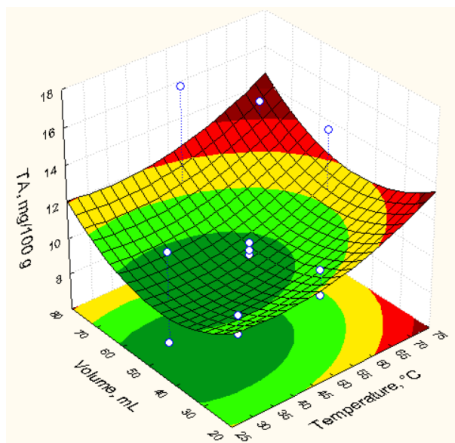

(e)

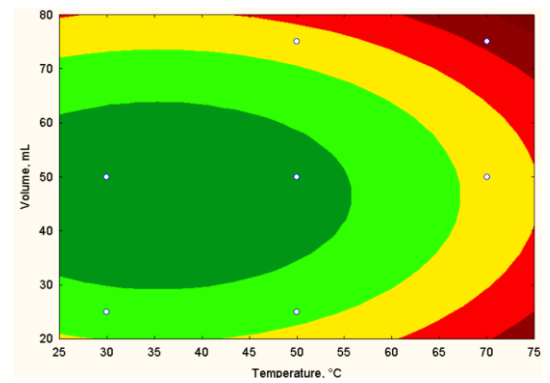

(f)

**Figure S1.** Response surface and contour plots for interactions between time, temperature, and volume of solid:liquid ratio m/v on extraction yield of total anthocyanins (TA). (a) and (b): time and temperature; (c) and (d) time and volume; and (e) and (f) temperature and volume.

Response surface and contour plots for interactions between independent variables (extraction factors) on extraction yield of total phenolic content from purple-fleshed sweet potatoes:

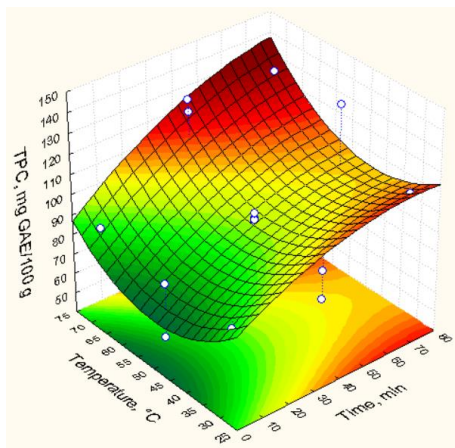

(a)

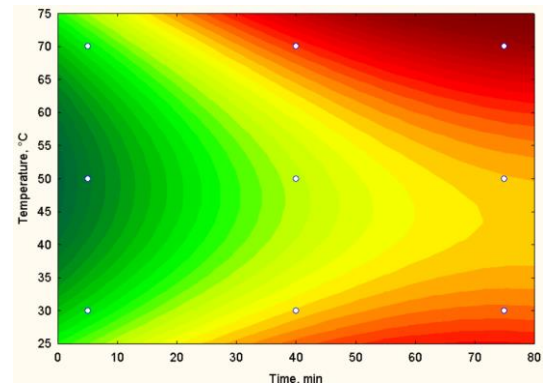

(b)

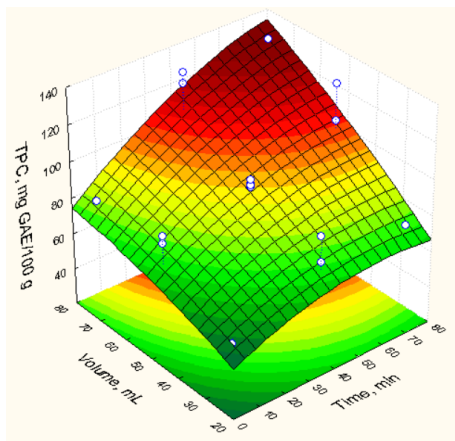

(c)

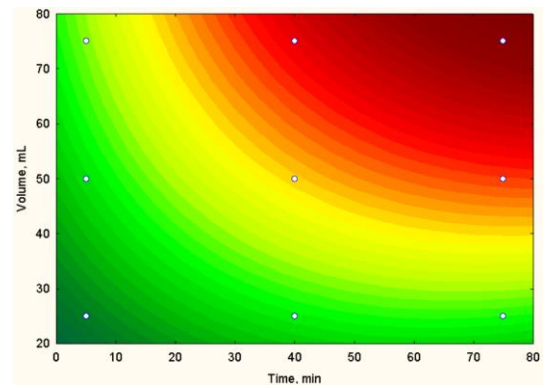

(d)

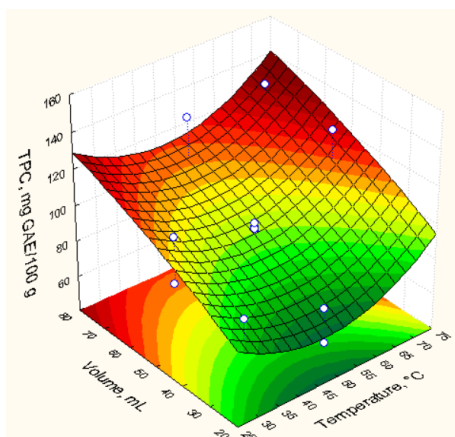

(e)

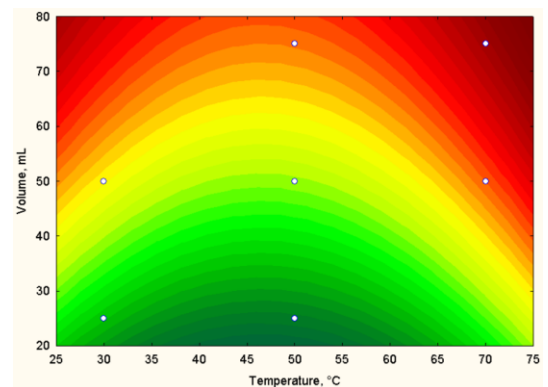

(f)

**Figure S2.** Response surface and contour plots for interactions between time, temperature, and volume of solid:liquid ratio m/v on extraction yield of total phenolic content (TPC). (a) and (b): time and temperature; (c) and (d) time and volume; and (e) and (f) temperature and volume
